# Supplementary material for: Thermodynamic study of lanthanide(iii) complexes with bifunctional monophosphinic acid analogues of H4dota and comparative kinetic study of yttrium(iii) complexes
Source: Royal Society of Chemistry journal article supplement (doi:10.1039/b613404a), 2006-12-15

## Electronic Supplementary Information

for

### **Thermodynamic study of lanthanide(III) complexes with bifunctional monophosphinic acid analogues of H<sub>4</sub>dota and comparative kinetic study of yttrium(III) complexes with H<sub>4</sub>dota-like ligands**

Michaela Försterová,<sup>a</sup> Ivona Svobodová,<sup>b,c</sup> Přemysl Lubal,<sup>b,\*</sup> Petr Táborský,<sup>b</sup> Jan Kotek,<sup>a</sup> Petr Hermann,<sup>a,\*</sup> and Ivan Lukeš<sup>a</sup>

<sup>a</sup> Department of Inorganic Chemistry, Universita Karlova (Charles University), Hlavova 2030, 128 40 Prague 2, Czech Republic. Tel: +420-22195-1263; Fax: +420-22195-1253; E-mail:

[petrh@natur.cuni.cz](mailto:petrh@natur.cuni.cz)

<sup>b</sup> Department of Analytical Chemistry, Masaryk University, Kotlářská 2, 611 37 Brno, Czech Republic. Tel: +420-54949-5637; Fax: +420-54949-2494; e-mail: [lubal@chemi.muni.cz](mailto:lubal@chemi.muni.cz)

<sup>c</sup> Institute of Analytical Chemistry, Czech Academy of Sciences, Veveří 97, 61142 Brno, Czech Republic.

**Figure S1** Dependence of <sup>1</sup>H (A) and <sup>31</sup>P (B) NMR chemical shift on pH.

**Figure S2** An example of the data obtained for the formation of yttrium(III)-macrocycle complexes in the presence of Arsenazo III ( $c_Y = 7.8 \times 10^{-7} \text{ mol dm}^{-3}$ ,  $c_{\text{Lig}} = 1.7 \times 10^{-5} \text{ mol dm}^{-3}$ , pH 6.07).

**Figure S3** An example of the experimental data obtained for the formation of the yttrium(III) complex of H<sub>5</sub>do3ap<sup>PrA</sup> in presence of Arsenazo III ( $c_Y = 7.8 \times 10^{-7} \text{ mol dm}^{-3}$ ,  $c_{\text{Lig}} = 1.7 \times 10^{-5} \text{ mol dm}^{-3}$ ) at different pH values.

**Figure S4** Correlation of rate constant  $k_H$  for dissociation of the yttrium(III) complexes with the first protonation constant of the ligands. The solid line was fitted for all the studied ligands and the dotted line was fitted only through three the most similar ligands (H<sub>4</sub>dota, H<sub>5</sub>do3ap<sup>PrA</sup> and H<sub>4</sub>do3ap<sup>ABn</sup>).

**Figure S1**

Dependence of  $^1\text{H}$  (A) and  $^{31}\text{P}$  (B) NMR chemical shift on pH.

**A**

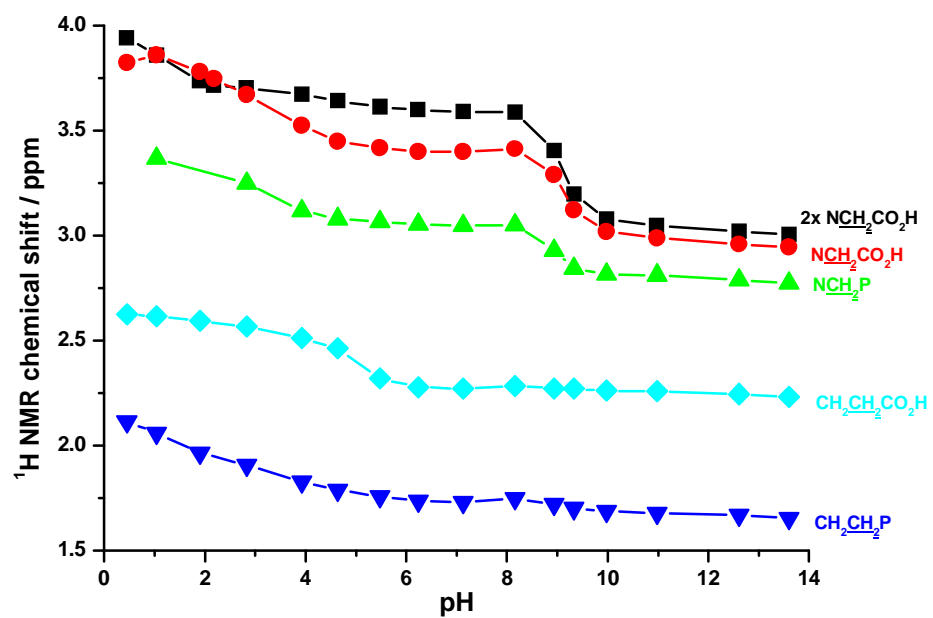

**B**

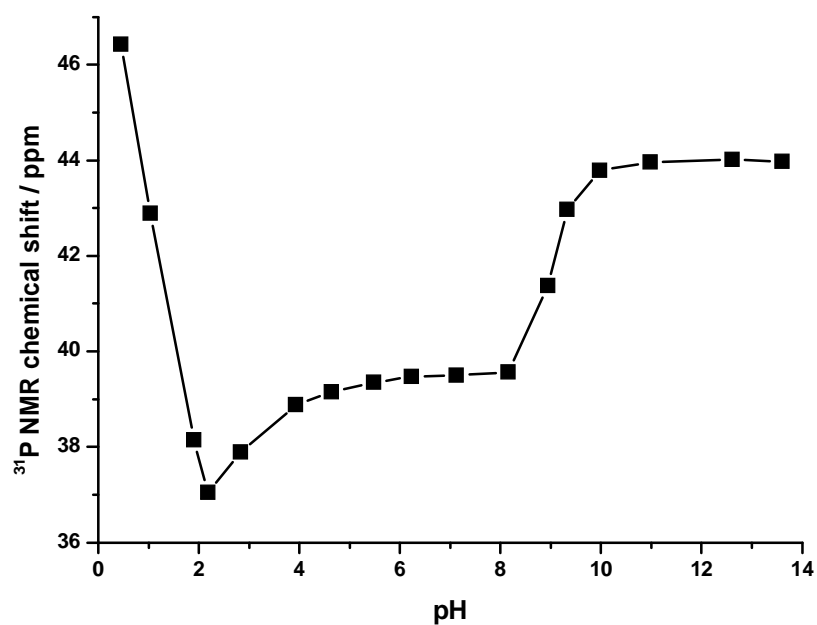

**Figure S2**

An example of the data obtained for the formation of yttrium(III)-macrocycle complexes in the presence of Arsenazo III ( $c_Y = 7.8 \times 10^{-7} \text{ mol dm}^{-3}$ ,  $c_{\text{Lig}} = 1.7 \times 10^{-5} \text{ mol dm}^{-3}$ , pH 6.07).

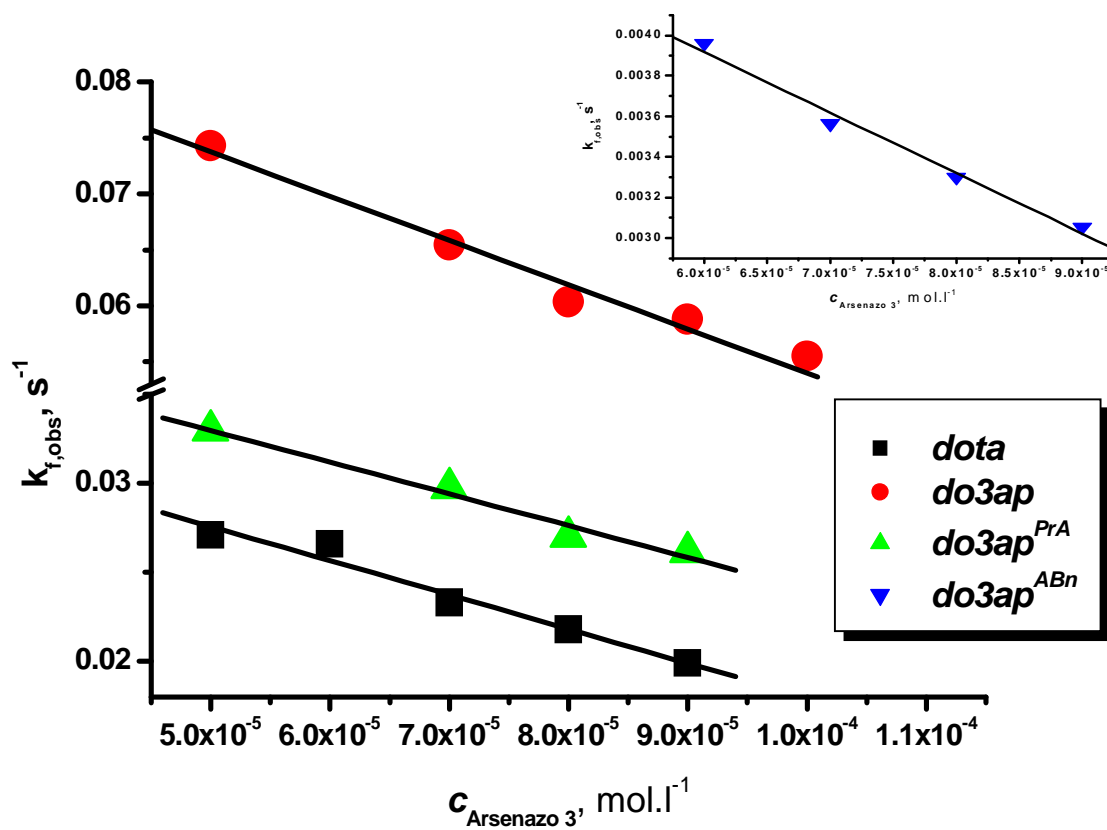

**Figure S3**

An example of the experimental data obtained for the formation of the yttrium(III) complex of  $\text{H}_5\text{do3ap}^{\text{PrA}}$  in presence of Arsenazo III ( $c_Y = 7.8 \times 10^{-7} \text{ mol dm}^{-3}$ ,  $c_{\text{Lig}} = 1.7 \times 10^{-5} \text{ mol dm}^{-3}$ ) at different pH values.

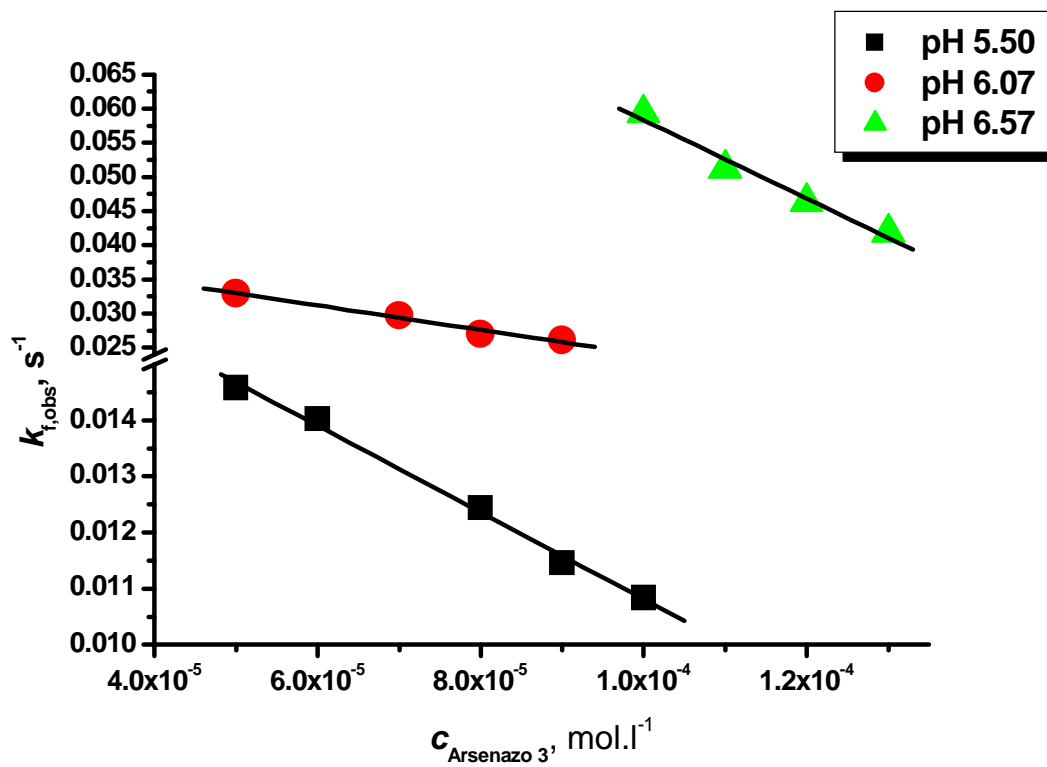

**Figure S4**

Correlation of rate constant  $k_H$  for dissociation of the yttrium(III) complexes with the first protonation constant of the ligands. The solid line was fitted for all the studied ligands and the dotted line was fitted only through three the most similar ligands ( $H_4dota$ ,  $H_5do3ap^{PrA}$  and  $H_4do3ap^{ABn}$ ).

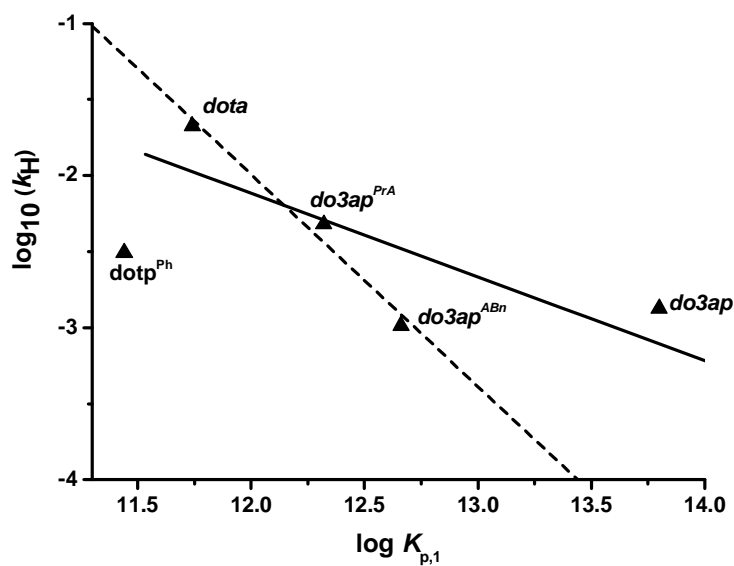

Supplement: b613404a.pdf [file b613404a.pdf]
